# Supplementary material for: Elbaite, the neotype material from the Rosina pegmatite, San Piero in Campo, Elba island, Italy
Source: Copernicus journal article supplement (doi:10.5194/ejm-37-505-2025), 2025-07-22
Supplement: Supplementary file 2 [file ejm-37-505-2025-supplement.zip]

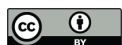

*Supplement of*

**Elbaite, the neotype material from the Rosina pegmatite, San Piero  
in Campo, Elba island, Italy**

**Ferdinando Bosi et al.**

*Correspondence to:* Ferdinando Bosi ([ferdinando.bosi@uniroma1.it](mailto:ferdinando.bosi@uniroma1.it))

- [ejm-37-505-2025-supplement-title-page.pdf](#)
- [checkCIF.pdf](#)
- [elbaite\\_1a.cif](#)

The copyright of individual parts of the supplement might differ from the article licence.
